# Supplementary material for: On the photoluminescence in triarylmethyl-centered mono-, di-, and multiradicals
Source: publisher site journal article supplement (doi:10.3762/bjoc.21.80), 2025-05-21
Supplement: Additional file 1 [file 1860-5397-21-80-S1.pdf]

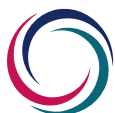

## Supporting Information

for

### **On the photoluminescence in triarylmethyl-centered mono-, di-, and multiradicals**

Daniel Straub, Markus Gross, Mona E. Arnold, Julia Zolg and Alexander J. C. Kuehne

*Beilstein J. Org. Chem.* **2025**, *21*, 964–998. [doi:10.3762/bjoc.21.80](https://doi.org/10.3762/bjoc.21.80)

### **Information about performed DFT calculations and photoluminescence quantum yield measurements**

## DFT calculations

The theoretical calculations of PTM-PTM and *m*-PTH were performed with ORCA 5.0.3.<sup>[1]</sup> The molecular geometry optimizations were carried out with the UB3LYP functional at the def2-SVP level of theory in vacuum using dispersion correction with the Becke-Johnson damping scheme (D3BJ).<sup>[2]</sup>

The singlet-triplet energy gap ( $\Delta E_{ST}$ ) was calculated with the Yamaguchi spin decontamination correction according to the following equation:<sup>[3]</sup>

$$\Delta E_{ST} = 2J = -\frac{2(E_T - E_{BS})}{\langle S^2 \rangle_T - \langle S^2 \rangle_{BS}}$$

Here,  $J$  corresponds to the intramolecular exchange interaction within the diradicals,  $E_T$  and  $E_{BS}$  represent the total energy of the calculated triplet and broken-symmetry state and  $\langle S^2 \rangle_T$  and  $\langle S^2 \rangle_{BS}$  correspond to the respective expectation value of the total spin squared operator. The diradical character  $y_0$  was calculated from the occupation number of the highest occupied natural orbital ( $n_{HONO}$ ) and of the lowest unoccupied natural orbital ( $n_{LUNO}$ ) according to Yamaguchi:<sup>[4]</sup>

$$y_0 = 1 - \frac{2T_0}{1 + T_0^2}$$
$$T_0 = \frac{n_{HONO} - n_{LUNO}}{2}$$

**Table S1:** Calculated electronic properties of PTM-PTM and *m*-PTH at the UB3LYP/def2-SVP level of theory.

|                                           | PTM-PTM      | <i>m</i> -PTH |
|-------------------------------------------|--------------|---------------|
| $E_T$ [kcal mol <sup>-1</sup> ]           | -8993695.883 | -7695210.997  |
| $E_{BS}$ [kcal mol <sup>-1</sup> ]        | -8993695.891 | -7695210.244  |
| $\Delta E_{ST}$ [kcal mol <sup>-1</sup> ] | <0.1         | 1.6           |
| $\langle S^2 \rangle_T$                   | 2.0418       | 2.0509        |
| $\langle S^2 \rangle_{BS}$                | 1.0423       | 1.0226        |
| $y_0$                                     | 0.998        | 0.777         |

## Photoluminescence Quantum Yield

Photoluminescence quantum yields  $\phi$  are determined with a Hamamatsu Quantaurus-QY (C11347) for cyclohexane solutions ( $10^{-5}$  M) at room temperature (293 K).

## References

- (1) F. Neese, *WIREs Comput. Mol. Sci.* **2022**, *12*, e1606. <https://doi.org/10.1002/wcms.1606>.
- (2) a) F. Weigend, *Phys. Chem. Chem. Phys.* **2006**, *8*, 1057-1065. <https://doi.org/10.1039/B508541A>; b) F. Weigend and R. Ahlrichs, *Phys. Chem. Chem. Phys.* **2005**, *7*, 3297-3305. <https://doi.org/10.1039/B515623H>; c) S. Grimme, J. Antony, S. Ehrlich and H. Krieg, *J. Chem. Phys.* **2010**, *132*, 154104. <https://doi.org/10.1002/jcc.21759>; d) S. Grimme, S. Ehrlich and L. Goerigk, *J. Comput. Chem.* **2011**, *32*, 1456-1465. <https://doi.org/10.1063/1.3382344>.

- (3) a) K. Yamaguchi, Y. Takahara and T. Fueno, *Applied Quantum Chemistry* (Dordrecht) **1986**, pp. 155- 184. [https://doi.org/10.1007/978-94-009-4746-7\\_11](https://doi.org/10.1007/978-94-009-4746-7_11). b) T.Soda et al. *Chem. Phys. Lett.* **2000**, 319, 223-230. [https://doi.org/10.1016/S0009-2614\(00\)00166-4](https://doi.org/10.1016/S0009-2614(00)00166-4).
- (4) K. Yamaguchi, *Chem. Phys. Lett.* **1975**, 33, 330-335. [https://doi.org/10.1016/0009-2614\(75\)80169-2](https://doi.org/10.1016/0009-2614(75)80169-2).
